# Supplementary material for: Sinonasal adenocarcinoma following styrene exposure in the reinforced plastics industry
Source: PubMed Central journal article supplement — Occup Environ Med. 2018 Mar 14;75(6):412–4. doi: 10.1136/oemed-2017-104974 (PMC5969366; doi:10.1136/oemed-2017-104974), 2018-03-14
Supplement: oemed-2017-104974supp001.pdf [file oemed-2017-104974supp001.pdf]

Supplementary material:

Sinonasal adenocarcinoma following styrene exposure in the reinforced plastics industry

Mette Schou Nissen<sup>1</sup>, Zara Ann Stokholm<sup>1</sup>, Mette Skovgaard Christensen<sup>1</sup>, Vivi Schlünssen<sup>2,3</sup>,  
Jesper Medom Vestergaard<sup>1</sup>, Inge Brosbøl Iversen<sup>1</sup>, Henrik Albert Kolstad<sup>1</sup>

<sup>1</sup>Department of Occupational Medicine, Danish Ramazzini Centre, Aarhus University Hospital, Nørrebrogade 44, DK-8000 Aarhus C, Denmark; <sup>2</sup>Department of Public Health, Danish Ramazzini Centre, Aarhus University, Bartholins Allé 2, DK-8000 Aarhus C, Denmark; <sup>3</sup>National Research Centre for the Working Environment, Lersø Parkallé 105, DK-2100 Copenhagen Ø, Denmark

Supplementary table 1. Incidence rates and unadjusted incidence rate ratios with 95% confidence intervals of sinonasal adenocarcinoma, squamous cell carcinoma, and a category of other histological subtypes by cumulative styrene exposure level in the Danish reinforced plastics industry, 1968-2011

| Cumulative styrene exposure level | Adenocarcinoma (n=9) |                   | Squamous cell carcinoma (n=15) |                  | Other histological subtypes (n=13) |                  |
|-----------------------------------|----------------------|-------------------|--------------------------------|------------------|------------------------------------|------------------|
|                                   | IR <sup>a</sup>      | IRR (95% CI)      | IR <sup>a</sup>                | IRR (95% CI)     | IR <sup>a</sup>                    | IRR (95% CI)     |
| <37 mg/m <sup>3</sup> -years      | 0.13                 | 1.00 (reference)  | 0.63                           | 1.00 (reference) | 0.76                               | 1.00 (reference) |
| ≥37 mg/m <sup>3</sup> -years      | 1.01                 | 8.00 (1.00-63.97) | 1.26                           | 2.00 (0.68-5.85) | 0.88                               | 1.17 (0.39-3.47) |
| Per 100 mg/m <sup>3</sup> -years  |                      | 1.10 (1.03-1.18)  |                                | 1.03 (0.91-1.18) |                                    | 0.88 (0.59-1.31) |

Abbreviations: IR=incidence rate; IRR=incidence rate ratio; CI=confidence interval

<sup>a</sup>Per 100,000 person-years

Supplementary table 2. Odds ratios with 95% confidence intervals of sinonasal adenocarcinoma by styrene exposure received during the prior <15, 15-29 and >30 years in the Danish reinforced plastics industry, 1968-2011

| Styrene exposure | >15 years prior          | 15-29 years prior        | ≥30 years prior          |
|------------------|--------------------------|--------------------------|--------------------------|
|                  | OR <sup>a</sup> (95% CI) | OR <sup>a</sup> (95% CI) | OR <sup>a</sup> (95% CI) |
| Never exposed    | 1.00 (reference)         | 1.00 (reference)         | 1.00 (reference)         |
| Ever exposed     | 3.88 (0.71-21.05)        | 0.80 (0.18-3.67)         | 0.43 (0.06-3.33)         |

Abbreviations: OR=odds ratio; CI=confidence interval

<sup>a</sup>Cases and controls are matched on age, sex, and employment in a reinforced plastics company producing boats or in wood industry (never, ever, unknown)
